# Supplementary figures and images for: The spatial and metabolic basis of colony size variation
Source: PubMed Central journal article supplement — ISME J. 2018 Jan 24;12(3):669–80. doi: 10.1038/s41396-017-0038-0 (PMC5864198; doi:10.1038/s41396-017-0038-0), 2018-01-24

# Supplementary Figure 2

**A**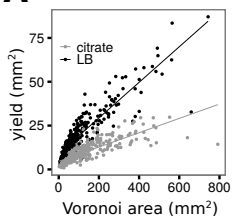**B**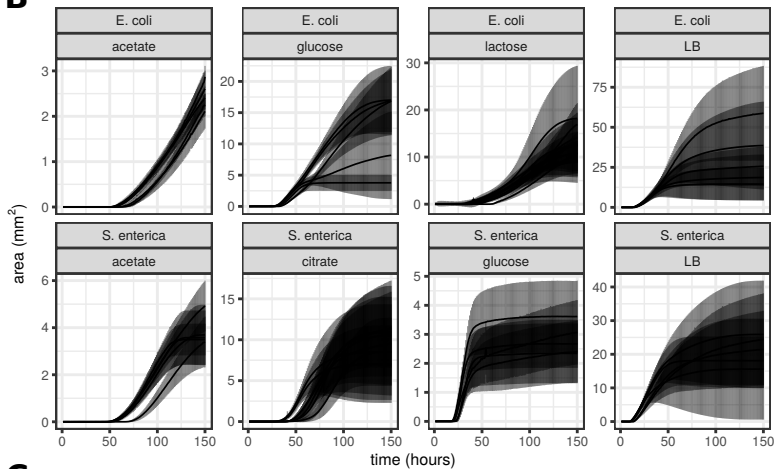**C**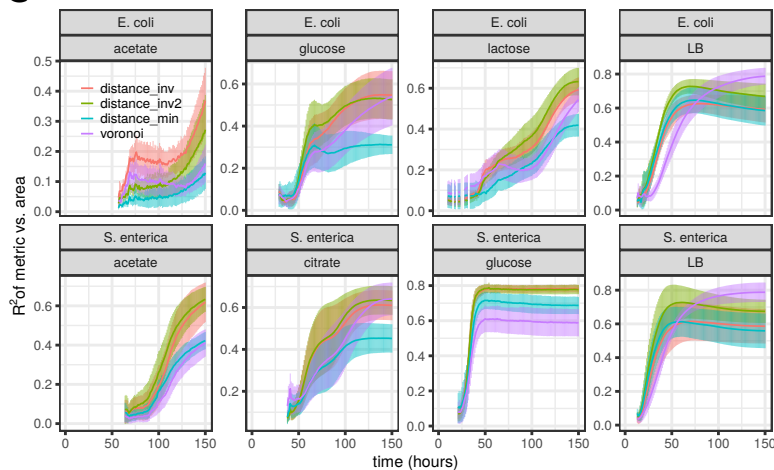

Supplement: 41396_2017_38_MOESM5_ESM.pdf [file 41396_2017_38_MOESM5_ESM.pdf]

# Supplementary Figure 3

## A

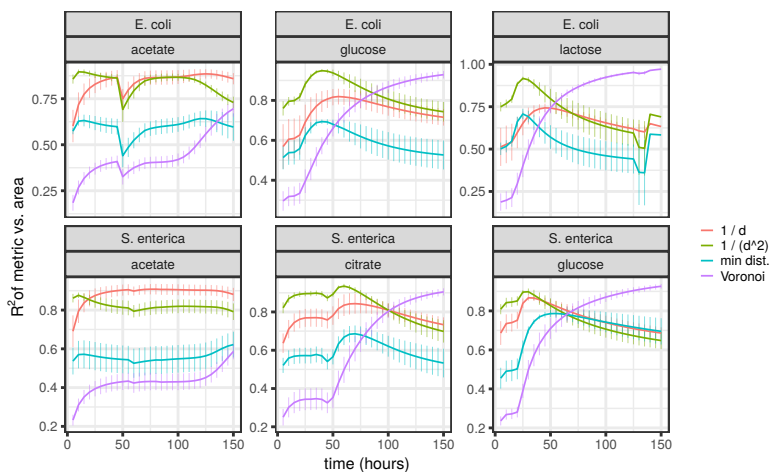

## B

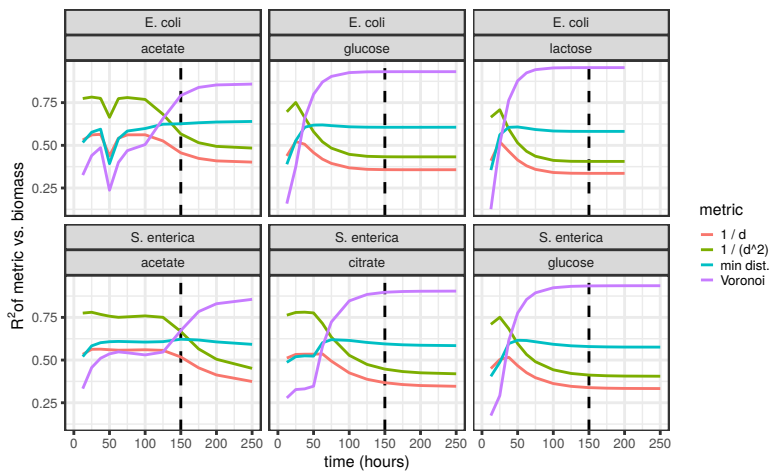

## C

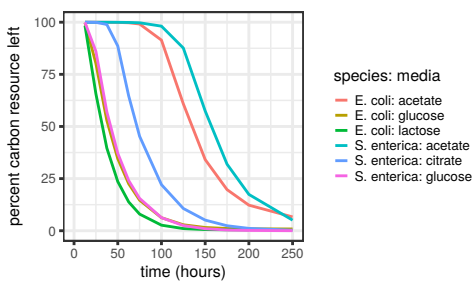

Supplement: 41396_2017_38_MOESM6_ESM.pdf [file 41396_2017_38_MOESM6_ESM.pdf]

# Supplementary Figure 4

**A**
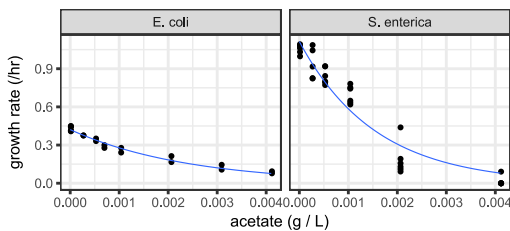
**B**
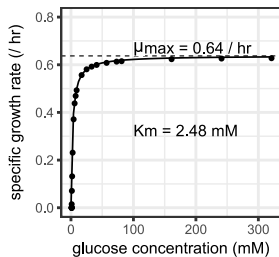
**C**
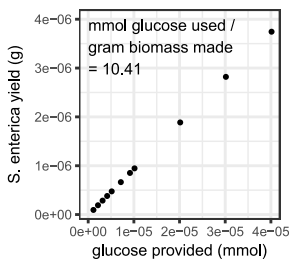
**D**
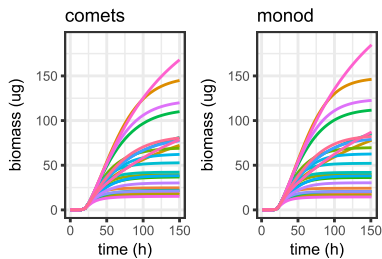
**E**
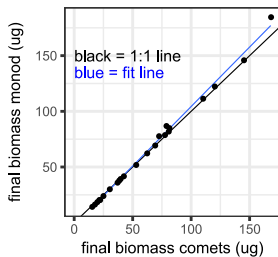
**F**
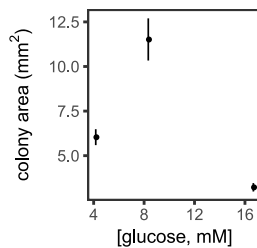
**G**
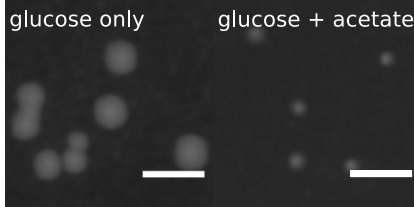
**H**
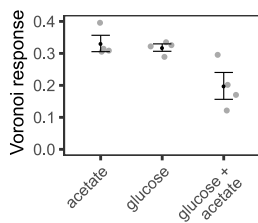

Supplement: 41396_2017_38_MOESM7_ESM.pdf [file 41396_2017_38_MOESM7_ESM.pdf]
